# Supplementary material
Source: PubMed Central journal article supplement (PMC6317358)
Supplement: NIHMS990571-supplement-2.pdf [file NIHMS990571-supplement-2.pdf]

SUPPLEMENTAL INFORMATION

SUPPLEMENTAL FIGURES

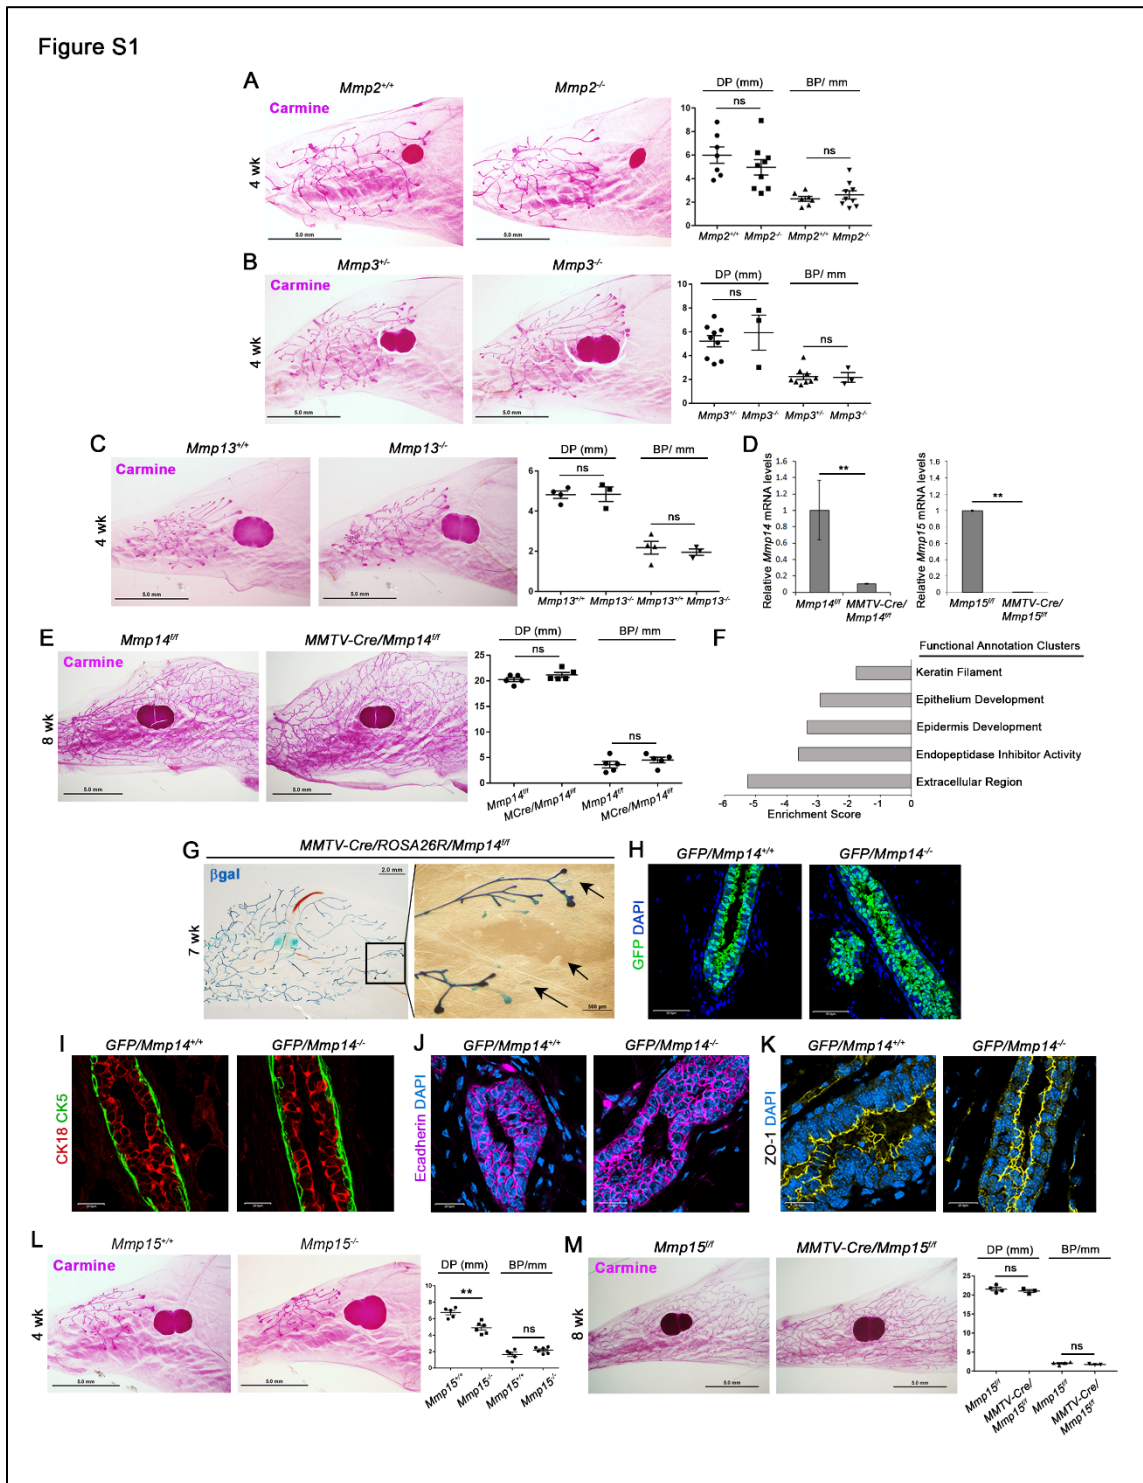

**Figure S1. Postnatal mammary gland branching proceeds independently of MMP2, MMP3 and MMP13 as well as epithelial cell-derived MT1-MMP and MT2-MMP *in vivo*, Related to Figure 1.**

- (A) Carmine staining of mammary gland whole mounts from 4 week-old *Mmp2*<sup>+/+</sup> (n=7) and *Mmp2*<sup>-/-</sup> (n=9) mice with quantification of ductal penetration (DP) (mm) and branch points per mm duct (BP/mm). Data are presented as mean ± SEM.
- (B) Carmine staining of whole mounts from 4 week-old *Mmp3*<sup>+/+</sup> (n=9) and *Mmp3*<sup>-/-</sup> (n=3) mice with quantification of DP (mm) and BP per mm duct. Data are presented as mean ± SEM.
- (C) Carmine staining of whole mounts from 4 week-old *Mmp13*<sup>+/+</sup> (n=4) and *Mmp13*<sup>-/-</sup> (n=3) mice with quantifications of DP (mm) and BP per mm duct. Data are presented as mean ± SEM.
- (A-C) Scale bar, 5.0 mm.
- (D) QPCRs for *Mmp14* and *Mmp15* in mammary epithelial cells harvested from 4 week-old *Mmp14*<sup>fl/fl</sup> and *MMTV-Cre*<sup>+/-</sup>/*Mmp14*<sup>fl/fl</sup> mice, and from 4 week-old *Mmp15*<sup>fl/fl</sup> and *MMTV-Cre*<sup>+/-</sup>/*Mmp15*<sup>fl/fl</sup>, as normalized to *Gapdh* (n=4, \*\*p<0.001; mean ± SEM).
- (E) Carmine-staining of mammary gland whole mounts isolated from 8 week-old *Mmp14*<sup>fl/fl</sup> and *MMTV-Cre*<sup>+/-</sup>/*Mmp14*<sup>fl/fl</sup> mice (scale bar, 5.0 mm) with quantification of DP (mm) and BP per mm duct from n=5 mice per genotype. Data are presented as mean ± SEM.
- (F) Chart of Functional Annotation Clusters and Gene ontology (GO) categories down-regulated in mammary epithelial cells harvested from 4 week-old *Mmp14*<sup>fl/fl</sup> and *MMTV-Cre*<sup>+/-</sup>/*Mmp14*<sup>fl/fl</sup> mice (n=3 per genotype) with associated enrichment scores.
- (G) LacZ staining of *MMTV-Cre*<sup>+/-</sup>/*Mmp14*<sup>fl/fl</sup>/*Rosa26R*<sup>+/-loxP</sup> mammary gland whole mount from 7 week-old mice (scale bar, 2.0 mm). A box circumscribes the region at higher magnification (scale bar, 500 μm). Arrows indicate the wild-type (Cre-negative) ducts.
- (H) GFP fluorescence with DAPI staining in mammary tissue cross-sections at 8 weeks post-transplantation of *Gfp*<sup>+/-</sup>/*Mmp14*<sup>+/+</sup> and *Gfp*<sup>+/-</sup>/*Mmp14*<sup>-/-</sup> ducts (scale bar, 50.0 μm).

- (I-K) Immunofluorescence for CK18 and CK5 (I), E-cadherin (J) and Zonula occludens (ZO)-1 with DAPI staining (K) in mammary tissue cross-sections at 8 weeks post-transplantation of *Gfp<sup>+/-</sup>Mmp14<sup>+/-</sup>* and *Gfp<sup>+/-</sup>Mmp14<sup>-/-</sup>* ducts (scale bar, 20.0  $\mu$ m).
- (L) Carmine-staining of mammary gland whole mounts isolated from 4 week-old *Mmp15<sup>+/+</sup>* (n=5) and *Mmp15<sup>-/-</sup>* (n=6) mice (scale bar, 5.0 mm) with quantification of DP (mm) and BP per mm duct. Data are presented as mean  $\pm$  SEM. (\*\*p=0.0012)
- (M) Carmine-staining of mammary gland whole mounts isolated from 8 week-old *Mmp15<sup>ff</sup>* (n=4) and *MMTV-Cre<sup>+/-</sup>/Mmp15<sup>ff</sup>* mice (n=3) (scale bar, 5.0 mm) with quantification of DP (mm) and BP per mm duct. Data are presented as mean  $\pm$  SEM.

Figure S2

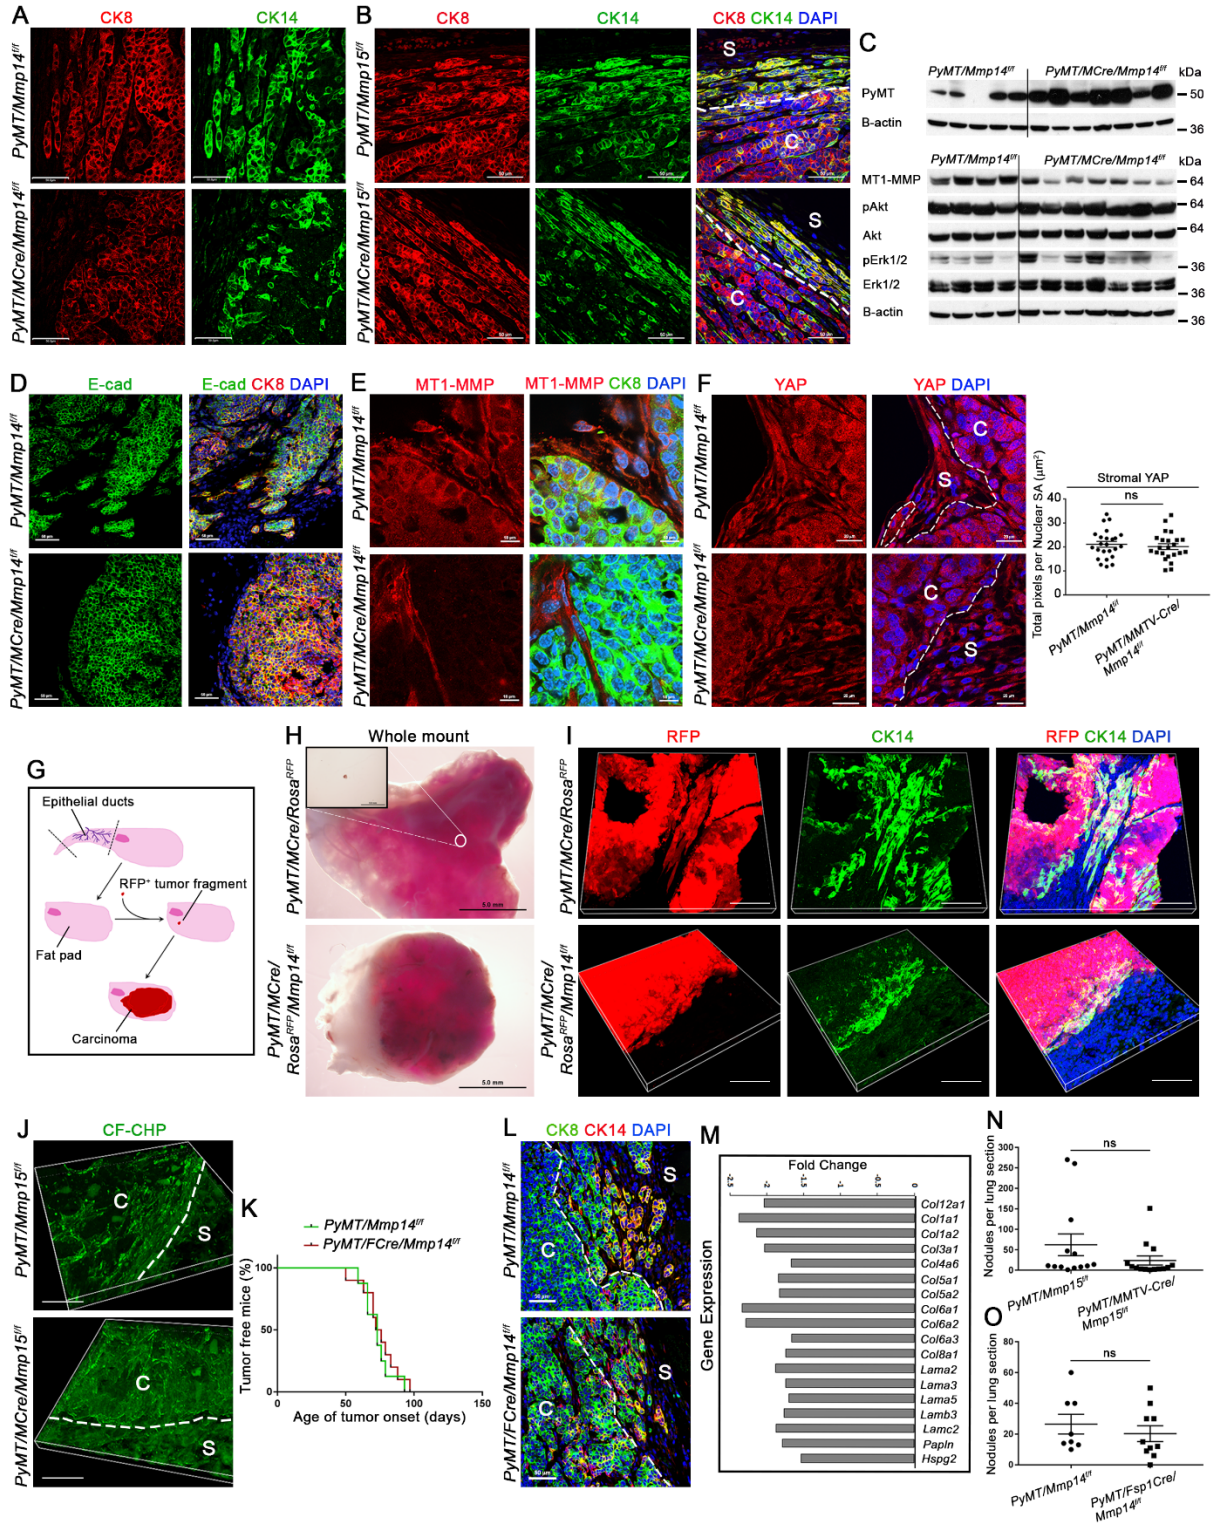

**Figure S2. Carcinoma cell-derived MT1-MMP controls local invasion and metastasis independently of MT2-MMP or stromal cell-derived MT1-MMP, Related to Figure 2.**

- (A) CK8 and CK14 immunofluorescence in mammary tumors harvested from 3-4 month-old *MMTV-PyMT<sup>+/-</sup>/Mmp14<sup>ff</sup>* and *MMTV-PyMT<sup>+/-</sup>/MMTV-Cre<sup>+/-</sup>/Mmp14<sup>ff</sup>* mice (scale bar, 50.0  $\mu$ m).
- (B) CK8 and CK14 immunofluorescence with DAPI staining in mammary tumor cross-sections from 3-4 month-old *MMTV-PyMT<sup>+/-</sup>/Mmp15<sup>ff</sup>* and *MMTV-PyMT<sup>+/-</sup>/MMTV-Cre<sup>+/-</sup>/Mmp15<sup>ff</sup>* mice (scale bar, 50.0  $\mu$ m). Dotted lines mark the tumor-stromal interface. "S" indicates the stroma and "C" indicates the carcinoma in each section.
- (C) Western blots for PyMT, MT1-MMP, pAkt, Akt, pErk1/2 and Erk1/2 in mammary tumors harvested from 3-4 month-old *MMTV-PyMT<sup>+/-</sup>/Mmp14<sup>ff</sup>* and *MMTV-PyMT<sup>+/-</sup>/MMTV-Cre<sup>+/-</sup>/Mmp14<sup>ff</sup>* mice, as normalized to  $\beta$ -actin.
- (D) Immunofluorescence of E-cadherin with CK8 and DAPI staining at the invasive edge of mammary tumor cross-sections from 3-4 month-old *MMTV-PyMT<sup>+/-</sup>/Mmp14<sup>ff</sup>* and *MMTV-PyMT<sup>+/-</sup>/MMTV-Cre<sup>+/-</sup>/Mmp14<sup>ff</sup>* mice (scale bar, 50  $\mu$ m).
- (E) MT1-MMP immunofluorescence in 3-4 month-old *MMTV-PyMT<sup>+/-</sup>/Mmp14<sup>ff</sup>* and *MMTV-PyMT<sup>+/-</sup>/MMTV-Cre<sup>+/-</sup>/Mmp14<sup>ff</sup>* mammary tumors (scale bar, 10  $\mu$ m).
- (F) Stromal cell YAP immunofluorescence in 3-4 month-old *MMTV-PyMT<sup>+/-</sup>/Mmp14<sup>ff</sup>* and *MMTV-PyMT<sup>+/-</sup>/MMTV-Cre<sup>+/-</sup>/Mmp14<sup>ff</sup>* mammary tumors. Dotted line marks the tumor-stromal interface (scale bar, 20  $\mu$ m). Quantification of the total pixels of YAP immunofluorescence per stromal cell nuclear surface area ( $\mu$ m<sup>2</sup>) in n=4 tumors and n>20 fields per genotype. Data are presented as mean  $\pm$  SEM.
- (G) Cartoon of mammary tumor fragment transplantation.
- (H) Whole mounts of RFP<sup>+</sup> tumors derived from *MMTV-PyMT<sup>+/-</sup>/MMTV-Cre<sup>+/-</sup>/Rosa<sup>RFP</sup>* and *MMTV-PyMT<sup>+/-</sup>/MMTV-Cre<sup>+/-</sup>/Rosa<sup>RFP</sup>/Mmp14<sup>ff</sup>* mammary tumor fragments at 7 weeks post-transplantation (scale bar, 5.0 mm). Inset shows tumor fragment before transplant

(scale bar, 5.0 mm). Circle drawn on tumor at 7 weeks indicates initial fragment size for comparison. Note the corrugated boundaries of the wild-type tumor mass relative to the conditional knockout.

- (I) 3-D reconstructions of RFP fluorescence and CK14 immunofluorescence with DAPI staining in tumors derived from *MMTV-PyMT<sup>+/-</sup>/MMTV-Cre<sup>+/-</sup>/Rosa<sup>RFP</sup>* and *MMTV-PyMT<sup>+/-</sup>/MMTV-Cre<sup>+/-</sup>/Rosa<sup>RFP</sup>/Mmp14<sup>fl/fl</sup>* mammary tumor fragments at 7 weeks post-transplantation (scale bar, 50  $\mu$ m).
- (J) 3-D reconstructions of CF-CHP immunofluorescence in mammary tumors harvested from 3-4 month-old *MMTV-PyMT<sup>+/-</sup>/Mmp15<sup>fl/fl</sup>* and *MMTV-PyMT<sup>+/-</sup>/MMTV-Cre<sup>+/-</sup>/Mmp15<sup>fl/fl</sup>* mice. Dotted lines mark the tumor-stromal interface (scale bar, 30  $\mu$ m).
- (K) Kaplan-Meier plots depicting age of tumor onset (days) for *MMTV-PyMT<sup>+/-</sup>/Mmp14<sup>fl/fl</sup>* (n=12) versus *MMTV-PyMT<sup>+/-</sup>/Fsp1-Cre<sup>+/-</sup>/Mmp14<sup>fl/fl</sup>* (n=13) mice.
- (L) CK8 and CK14 immunofluorescence with DAPI staining in mammary tumor cross-sections from 3-4 month-old *MMTV-PyMT<sup>+/-</sup>/Mmp14<sup>fl/fl</sup>* and *MMTV-PyMT<sup>+/-</sup>/Fsp1-Cre<sup>+/-</sup>/Mmp14<sup>fl/fl</sup>* mice (scale bar, 50  $\mu$ m). Dotted lines mark the tumor-stromal interface.
- (M) Changes in ECM transcriptomes in 3-4 month-old *MMTV-PyMT<sup>+/-</sup>/Mmp14<sup>fl/fl</sup>* and *MMTV-PyMT<sup>+/-</sup>/MMTV-Cre<sup>+/-</sup>/Mmp14<sup>fl/fl</sup>* mammary tumors (n=4 per genotype).
- (N) Quantification of lung nodules per cross-section in lungs harvested from *MMTV-PyMT<sup>+/-</sup>/Mmp15<sup>fl/fl</sup>* (n=13) and *MMTV-PyMT<sup>+/-</sup>/MMTV-Cre<sup>+/-</sup>/Mmp15<sup>fl/fl</sup>* (n=14) mice. Data are presented as mean  $\pm$  SEM.
- (O) Quantification of lung nodules per cross-section in lungs harvested from *MMTV-PyMT<sup>+/-</sup>/Mmp14<sup>fl/fl</sup>* (n=8) and *MMTV-PyMT<sup>+/-</sup>/Fsp1-Cre<sup>+/-</sup>/Mmp14<sup>fl/fl</sup>* (n=10) mice. Data are presented as mean  $\pm$  SEM.



Figure S3

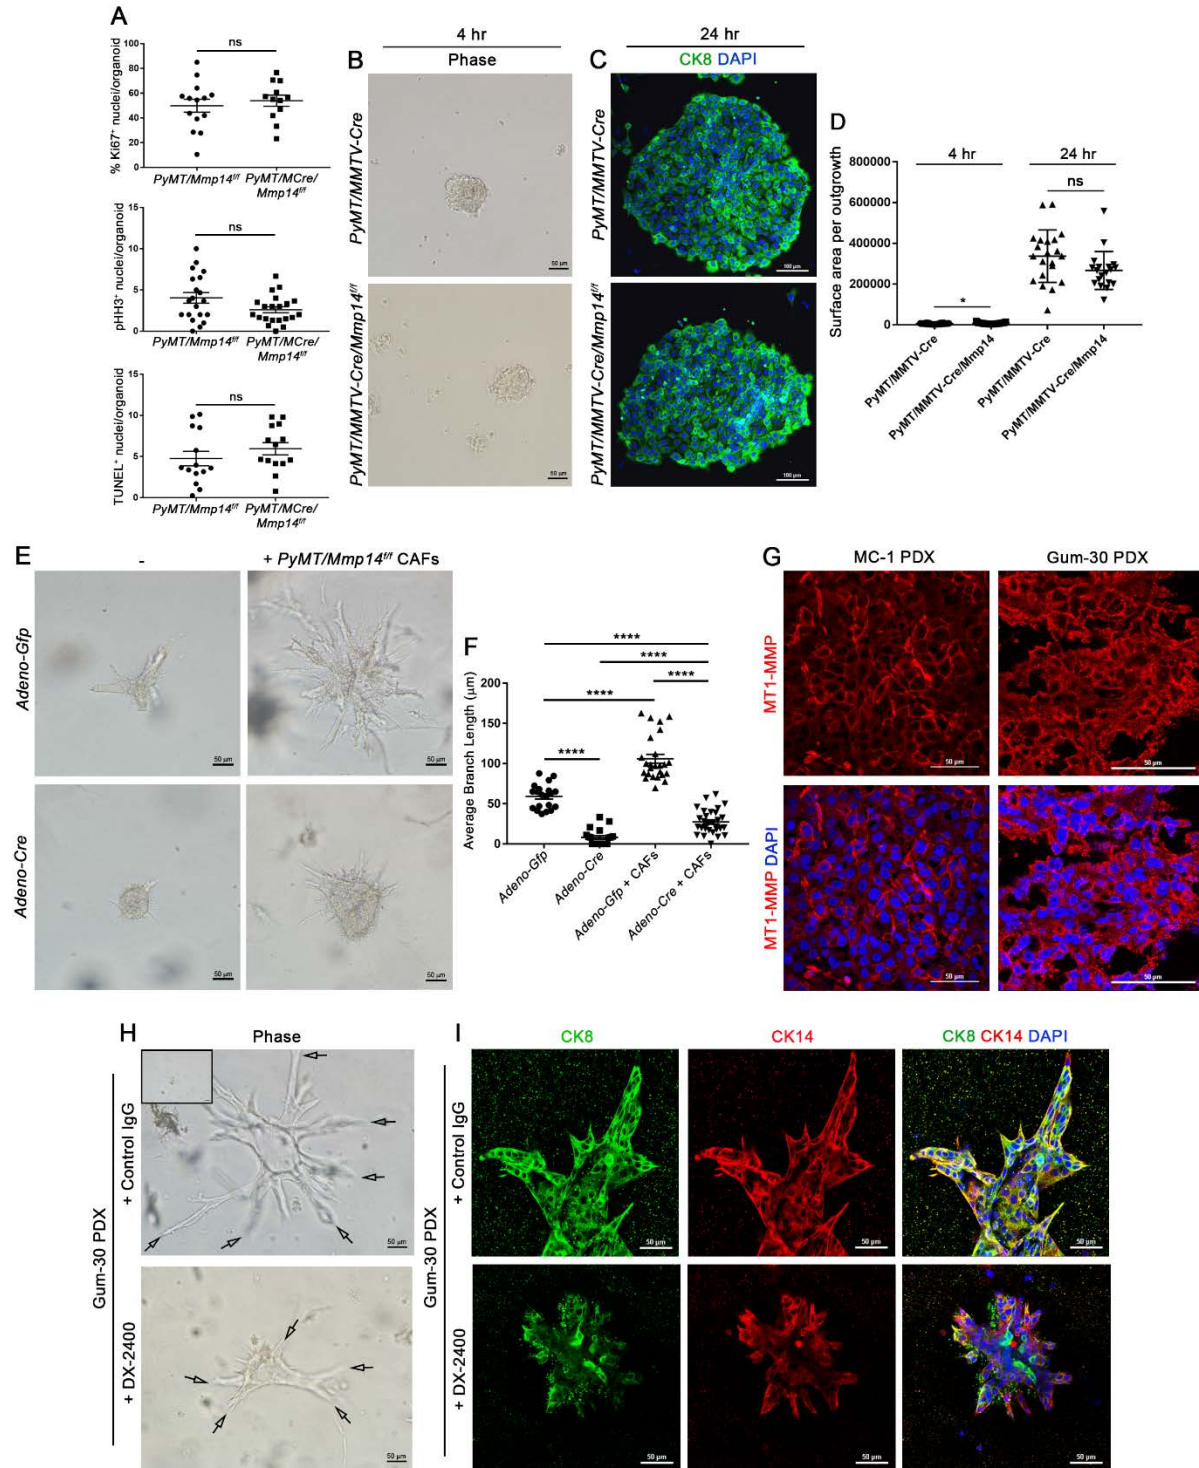

**Figure S3. MT1-MMP directs both mouse and human breast carcinoma invasion programs *ex vivo*, Related to Figure 3.**

- (A) Quantification of the percentage of Ki67-positive nuclei per organoid ( $n \geq 12$  per genotype) (top panel), the number of phospho-histone H3 (pHH3)-positive nuclei per organoid ( $n \geq 20$  per genotype) (middle panel), and the number of TUNEL-positive nuclei per organoid ( $n = 14$  per genotype) (lower panel) in *MMTV-PyMT<sup>+/-</sup>/Mmp14<sup>fl/fl</sup>* and *MMTV-PyMT<sup>+/-</sup>/MMTV-Cre<sup>+/-</sup>/Mmp14<sup>fl/fl</sup>* mammary carcinoma-derived organoids after 3 days of culture within 3-D type I collagen with FGF-2. Data are presented as mean  $\pm$  SEM.
- (B) Bright-field micrographs of *MMTV-PyMT<sup>+/-</sup>/Mmp14<sup>fl/fl</sup>* and *MMTV-PyMT<sup>+/-</sup>/MMTV-Cre<sup>+/-</sup>/Mmp14<sup>fl/fl</sup>* mammary carcinoma-derived organoids cultured atop a 3-D type I collagen hydrogel with FGF-2 at 4 hours.
- (C) CK8 immunofluorescence with DAPI counter-staining in *MMTV-PyMT<sup>+/-</sup>/Mmp14<sup>fl/fl</sup>* and *MMTV-PyMT<sup>+/-</sup>/MMTV-Cre<sup>+/-</sup>/Mmp14<sup>fl/fl</sup>* mammary carcinoma-derived organoids after 24 hours of culture atop a 3-D type I collagen hydrogel with FGF-2.
- (D) Quantification of *MMTV-PyMT<sup>+/-</sup>/Mmp14<sup>fl/fl</sup>* and *MMTV-PyMT<sup>+/-</sup>/MMTV-Cre<sup>+/-</sup>/Mmp14<sup>fl/fl</sup>* mammary carcinoma-derived organoid surface area at 4 hours and following outgrowth at 24 hours ( $n \geq 30$  at 4 hours and  $n \geq 20$  at 24 hours from representative experiment). (\* $p = 0.0141$  with *MMTV-PyMT<sup>+/-</sup>/Mmp14<sup>fl/fl</sup>* at  $5813 \pm 433.5 \mu\text{m}^2$  and *MMTV-PyMT<sup>+/-</sup>/MMTV-Cre<sup>+/-</sup>/Mmp14<sup>fl/fl</sup>* at  $7622 \pm 570.9 \mu\text{m}^2$ ).
- (E) Bright-field micrographs of mammary carcinoma-derived organoids harvested from 3 month-old *MMTV-PyMT<sup>+/-</sup>/Mmp14<sup>fl/fl</sup>* mice and transduced with either Adenoviral-GFP or Adenoviral-Cre prior to embedding in 3-D type I collagen for 3 days with FGF-2 in the presence or absence of *MMTV-PyMT<sup>+/-</sup>/Mmp14<sup>fl/fl</sup>* tumor-derived CAFs (scale bar, 50  $\mu\text{m}$ ).
- (F) Quantifications of tumor organoid invasion, as represented by the average branch length ( $\mu\text{m}$ ) of the three longest branches (\*\*\*\* $p < 0.0001$ ;  $n \geq 19$  for organoid alone conditions and  $n \geq 25$  for co-culture conditions). Data are presented as mean  $\pm$  SEM.



- (G) MT1-MMP immunofluorescence with DAPI staining in cross-sections from intact human patient-derived xenograft (PDX) tumors MC-1 and Gum30 (scale bar, 50  $\mu\text{m}$ ).
- (H) Bright-field micrographs of organoids harvested from PDX Gum30 tumors and embedded within 3-D type I collagen for 4 days with FGF-2 in the presence of the anti-MT1-MMP antibody (DX-2400) or a control IgG antibody (scale bar, 50  $\mu\text{m}$ ). Inset shows bright-field micrograph of Gum30 organoid at time 0. Arrows mark terminal ends of branching structures. Organoid branch length is reduced from  $150.5 \pm 7.7 \mu\text{m}$  with  $8.8 \pm 0.9$  branches/organoid in the presence of control IgG (n=18) to  $65.0 \pm 6.1 \mu\text{m}$  with  $4.9 \pm 0.6$  branches/organoid in the presence of DX-2400 (n=15) ( $p \leq 0.001$ , mean  $\pm$  SEM).
- (I) CK8 and CK14 immunofluorescence with DAPI staining in organoids harvested from PDX Gum30 tumors and embedded within 3-D type I collagen for 4 days with FGF-2 in the presence of DX-2400 antibody or control IgG antibody (scale bar, 50  $\mu\text{m}$ ).



**Figure S4. Stromal cell-derived MT1-MMP controls mammary gland branching in an organ autonomous fashion independent of stromal cell-derived growth factors, macrophages or endothelial cells, Related to Figure 5.**

- (A) Schematic of whole mammary gland transplant procedure.
- (B) Carmine-stained whole mounts of transplanted donor mammary glands from *Mmp14<sup>fl/fl</sup>* or *Dermo1-Cre<sup>+/-</sup>/Mmp14<sup>fl/fl</sup>* mice at 10 days and 5 weeks post-transplantation (scale bar, 2.0 mm). “LN” indicates donor inguinal lymph node.
- (C) Bright-field micrographs of mammary epithelial organoids harvested from 6 week-old *Mmp14<sup>fl/fl</sup>* and *Dermo1-Cre<sup>+/-</sup>/Mmp14<sup>fl/fl</sup>* mice and cultured within Matrigel with FGF-2 with quantification of branch number per organoid from n=12 fields per genotype (scale bar, 50  $\mu$ m). Data are presented as mean  $\pm$  SEM. Inset shows bright-field micrograph of organoid at time 0.
- (D) Gene ontology (GO) categories differentially expressed in 4 week-old *Dermo1-Cre<sup>+/-</sup>/Mmp14<sup>fl/fl</sup>* and wild-type mammary tissue (n=3 per genotype).
- (E) Bright-field micrographs of mammary epithelial organoids harvested from 6 week-old *Mmp14<sup>fl/fl</sup>* mice and cultured within Matrigel alone under basal conditions (without FGF-2) (left panel), in the presence of 100 *Mmp14<sup>fl/fl</sup>* fibroblasts per organoid (middle panel), or in the presence of 100 *Dermo1-Cre<sup>+/-</sup>/Mmp14<sup>fl/fl</sup>* fibroblasts per organoid (right panel) (scale bar, 50  $\mu$ m) with quantification of branch number per organoid (\*\*p=0.0002, \*\*\*\*p<0.0001).
- (F) Senescence-associated  $\beta$ -galactosidase (SA- $\beta$ gal) staining (pH 6.0) of mammary gland cross-sections from 4 week-old *Mmp14<sup>fl/fl</sup>* and *Dermo1-Cre<sup>+/-</sup>/Mmp14<sup>fl/fl</sup>* mice with Eosin counter-staining (scale bar, 200  $\mu$ m).
- (G) F4/80 with  $\alpha$ -smooth muscle actin ( $\alpha$ SMA) immunofluorescence to delineate the myoepithelial cell compartment and DAPI staining (scale bar, 50  $\mu$ m) in *Mmp14<sup>fl/fl</sup>* and *Dermo1-Cre<sup>+/-</sup>/Mmp14<sup>fl/fl</sup>* mammary gland cross-sections.

(H) CD31 (vascular endothelial cells) and Lyve1 (lymphatic endothelial cells) immunofluorescence with DAPI staining in *Mmp14<sup>ff</sup>* and *Dermo1-Cre<sup>+/-</sup>/Mmp14<sup>ff</sup>* mammary gland cross-sections (scale bar, 100 $\mu$ m).

Figure S5

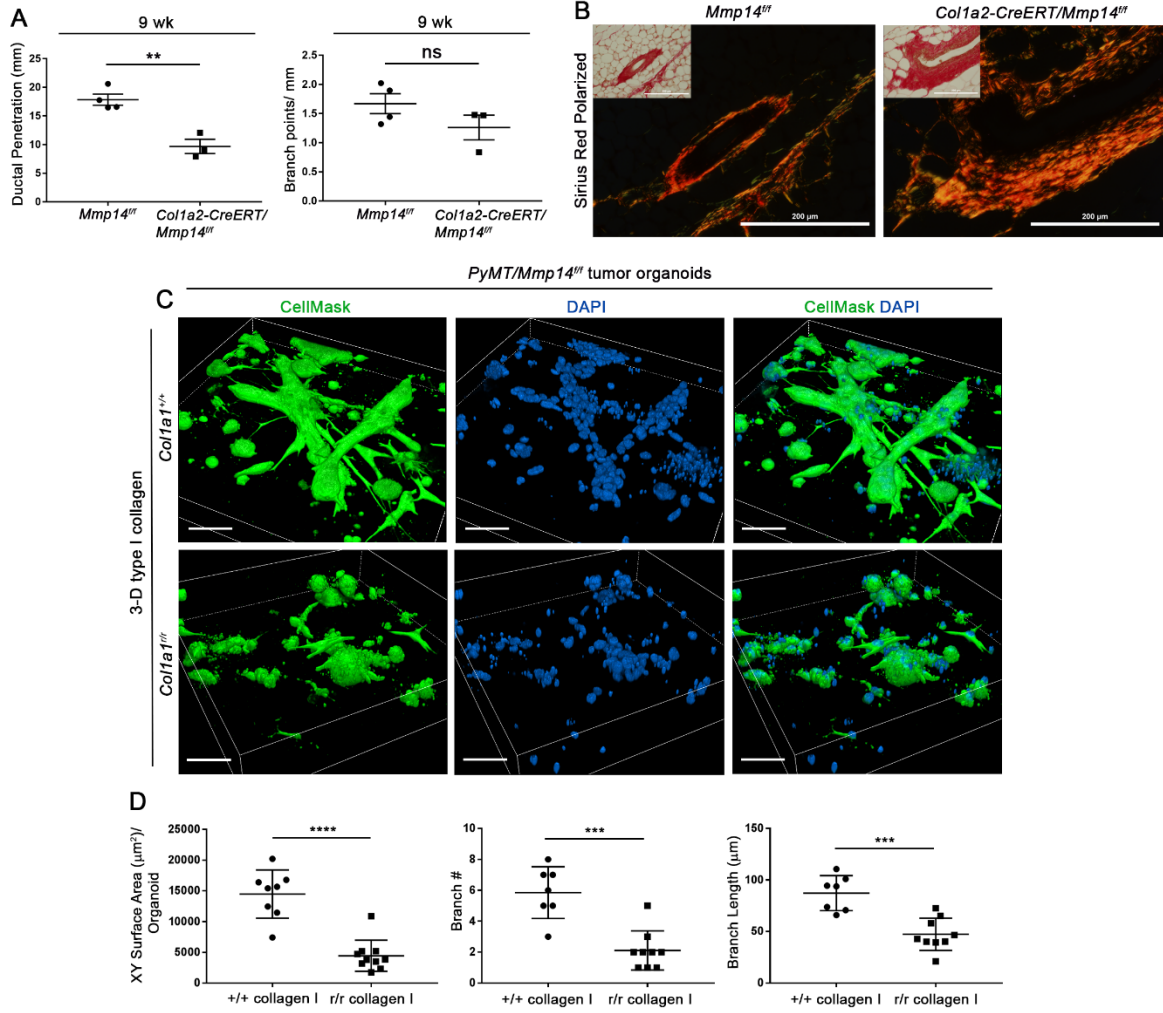



**Figure S5. Postnatal mammary gland branching requires type I collagen remodeling by periductal fibroblasts while invading carcinoma cells directly remodel type I collagen, Related to Figure 6.**

- (A) Quantification of ductal penetration (mm) and branch points per mm duct in 9 week-old mammary glands harvested from *Mmp14<sup>fl/fl</sup>* (n=4) and *Col1a2-CreERT<sup>+/-</sup>/Mmp14<sup>fl/fl</sup>* (n=3) (\*\*p=0.006).
- (B) Polarized light images of Sirius Red staining of 9 week-old *Mmp14<sup>fl/fl</sup>* and *Col1a2-CreERT<sup>+/-</sup>/Mmp14<sup>fl/fl</sup>* glands (scale bar, 200  $\mu$ m). Insets show corresponding bright-field images.
- (C) 3-D reconstructions of *MMTV-PyMT<sup>+/-</sup>/Mmp14<sup>fl/fl</sup>* mammary tumor organoids within 3-D type I collagen extracted from *Col1a1<sup>+/+</sup>* or *Col1a1<sup>fl/fl</sup>* mouse tails and labeled with CellMask dye and DAPI after 4 days of culture with FGF-2. Carcinoma cells invade 3-D hydrogels of native, but not mutant, type I collagen (scale bar, 50  $\mu$ m).
- (D) Quantifications of XY surface area ( $\mu$ m<sup>2</sup>), branch number and branch length ( $\mu$ m) of organoids cultured within *Col1a1<sup>+/+</sup>* or *Col1a1<sup>fl/fl</sup>* type I collagen for 4 days with FGF-2 (\*\*\*\*p<0.0001, \*\*\*p≤0.0005).

## SUPPLEMENTAL TABLES

**Table S1. Differential expression of epithelium-associated genes in array of *Mmp14*-targeted mammary epithelial cells, Related to Figure 1.**

| Gene           | Fold change |
|----------------|-------------|
| <i>Glycam1</i> | -40.9       |
| <i>Csn1s1</i>  | -6.99       |
| <i>Csn2</i>    | -5.31       |
| <i>Spr2a3</i>  | -4.77       |
| <i>Spr2a1</i>  | -2.99       |
| <i>Csn1s2a</i> | -2.39       |
| <i>Epgn</i>    | -2.07       |
| <i>Wfdc21</i>  | -2.06       |
| <i>Krt1</i>    | -2.03       |
| <i>Krt10</i>   | -1.95       |
| <i>Spr2e</i>   | -1.80       |
| <i>Spr1b</i>   | -1.78       |
| <i>Lalba</i>   | -1.77       |
| <i>Muc13</i>   | -1.56       |
| <i>Krt6b</i>   | -1.53       |
| <i>Areg</i>    | -1.52       |
| <i>Spr1a</i>   | -1.52       |

**Table S1.** Differential expression of epithelium-associated genes in Affymetrix microarray of mammary epithelial organoids isolated from *MMTV-Cre<sup>+/+</sup>/Mmp14<sup>fl/fl</sup>* female mice (n=2), as compared to *Mmp14<sup>fl/fl</sup>* female littermates (n=3).

**Table S2. Genotyping PCR Primers, Related to the STAR Methods Section.**

| Allele                      | Forward (5' to 3')                                                                                                     | Reverse (5' to 3')                                      |
|-----------------------------|------------------------------------------------------------------------------------------------------------------------|---------------------------------------------------------|
| <i>Mmp14<sup>KO</sup></i>   | <i>Mmp14<sup>WT</sup></i> : CTAGGCCTGGAACAT<br>TCTAACGATC<br><i>Mmp14<sup>KO</sup></i> : GTGCGAGGCCAGAGGC<br>CACTTGTGT | <i>Mmp14<sup>R</sup></i> :<br>CTTTGTGGGTGACCCTGACTTGC   |
| <i>Mmp14<sup>lacZ</sup></i> | <i>Mmp14<sup>lacZ</sup>(+)</i> :<br>ACCTGCGTGCAATCCATCTTG<br><i>Mmp14<sup>lacZ</sup>(-)</i> :<br>TGAGGTGGAAAACACGACCAG | <i>Mmp14<sup>lacZ</sup></i> :<br>ATGATGGCGGAGGGATCGTTAG |

|                              |                                                                                                                            |                                                                                                                      |
|------------------------------|----------------------------------------------------------------------------------------------------------------------------|----------------------------------------------------------------------------------------------------------------------|
| <i>Mmp15</i> <sup>KO</sup>   | <i>Mmp15</i> <sup>WT</sup> : CCGCCACCAAGCCTC<br>ACTGTCT<br><i>Mmp15</i> <sup>KO</sup> : CGCCACCAAGCCTCA<br>CTGTCT          | <i>Mmp15</i> <sup>WT</sup> : AAAGCCACCCACGCC<br>ATCAAAC<br><i>Mmp15</i> <sup>KO</sup> : AATTGCTGGGGATGG<br>AGGAAGGTA |
| <i>Mmp15</i> <sup>lacZ</sup> | GAGATGGCGCAACGCAATTAATG                                                                                                    | TGCACGTCCCATTCTCATGC                                                                                                 |
| <i>Mmp2</i> <sup>KO</sup>    | <i>Mmp2</i> <sup>WT</sup> : GTGCTACTGCAGGATA<br>AACTGATG<br><i>Mmp2</i> <sup>KO</sup> : GCGCCTACCGGTGGA<br>TGTGGAATGTGTGCG | <i>Mmp2</i> <sup>WT</sup> : CCGGGACAGGAACGTA<br>CTGGGTTC<br><i>Mmp2</i> <sup>KO</sup> : CCGGGACAGGAACGTA<br>CTGGGTTC |
| <i>Mmp3</i> <sup>KO</sup>    | <i>Mmp3</i> <sup>WT</sup> : ACCGGATTTGCCAAG<br>ACAGAGTG                                                                    | <i>Mmp3</i> <sup>WT</sup> : GCATCTCCATTAATCCC<br>TGGTCC                                                              |
| <i>Mmp13</i> <sup>KO</sup>   | <i>Mmp13</i> <sup>WT</sup> :<br>TTGGCCACTCCCTAGGTCT                                                                        | <i>Mmp13</i> <sup>WT</sup> :<br>CTACCCAGACAAGCAGTTTGC                                                                |
| <i>Neo</i>                   | AGGATCTCCTGTCATCTCAC<br>CTTGCTCCTG                                                                                         | AAGAACTCGTCAAGAAGG<br>CGATAGAAGGCG                                                                                   |
| <i>Mmp14</i> <sup>flox</sup> | GTTGAGGCAGGAGGATTGTGAGTT                                                                                                   | CCTGGAAAAGTGGGCGAGAAG                                                                                                |
| <i>iCre</i>                  | CCGTTTGCCGGTCGTGGG                                                                                                         | CGAATATCCTGGCAGCGATC                                                                                                 |
| <i>MMTV-Cre</i>              | GGTTCT GATCTGAGCTCTGAGTG                                                                                                   | CATCACTCGTTGCATCGACCGG                                                                                               |
| <i>PyMT</i>                  | Internal Control (oIMR8744):<br>CAAATGTTGCTTGTCTGGTG<br>Trangene (oIMR0384):<br>GGAAGCAAGTACTTCACAAGGG                     | Internal Control (oIMR8745):<br>GTCAGTCGAGTGCACAGTTT<br>Transgene (oIMR0385):<br>GGAAAGTCACTAGGAGCAGGG               |
| <i>Fsp1-Cre</i>              | ATGCTTCTGTCCGTTTGCCG                                                                                                       | CAATGCGATGCAATTTCTC                                                                                                  |
| <i>Col1a1</i> <sup>f</sup>   | TGGTTCTGGAATGAGGATGG                                                                                                       | TGCTCTGCTTCCTTAGTGC                                                                                                  |

**Table S3. Quantitative real-time PCR primers, Related to the STAR Methods Section.**

| Gene         | Forward (5' to 3')     | Reverse (5' to 3')     |
|--------------|------------------------|------------------------|
| <i>Gapdh</i> | TGAAGCAGGCATCTGAGGG    | CGAAGGTGGAAGAGTGGGAG   |
| <i>Arbp</i>  | CACTGGTCTAGGACCCGAGAA  | AGGGGGAGATGTTCAGCATGT  |
| <i>Mmp14</i> | CTGCCATTGCCGCCATGCAAAA | TGGCGTGGCACTCTCCCATACT |
| <i>Mmp15</i> | ACATGTCCACCATGCGCTCT   | TACCATGATGTCAGCCTCC    |
| <i>Mmp2</i>  | TCTGGAGCGAGGATACCCCAA  | TTCCAGGAGTCTGCGATGAGC  |
| <i>Mmp3</i>  | G TTCCTGATGTTGGTGGCTT  | AGCCTCTCCTTCAGAGATCC   |
| <i>Mmp13</i> | CTTTTCCTCCTGGACCAA ACT | TCATGGGCAGCAACAATAAA   |
